# Supplementary material for: Concentration dependence of the up- and down-conversion emission colours of Er3+-doped Y2O3: a time-resolved spectroscopy analysis
Source: Royal Society of Chemistry journal article supplement (doi:10.1039/c4cp02028f), 2014-01-01
Supplement: c4cp02028f1.pdf [file c4cp02028f1.pdf]

## Supporting information

# Concentration dependence of the up- and down-conversion emission colour of Er<sup>3+</sup>-doped Y<sub>2</sub>O<sub>3</sub>; a time-resolved spectroscopy analysis

Haizhou Lu<sup>a</sup>, William P. Gillin<sup>a,b\*</sup> and Ignacio Hernández<sup>c\*</sup>

[a] School of Physics and Astronomy, Queen Mary University of London, Mile End Road, London, E1 4NS, UK

[b] College of Physical Science and Technology, Sichuan University, Chengdu, 610064, People's Republic of China

[c] Dpto. CITIMAC, Universidad de Cantabria, Facultad de Ciencias, Avda. Los Castros, s/n 39005, Santander, Spain

\*[w.gillin@qmul.ac.uk](mailto:w.gillin@qmul.ac.uk)

\*[ignacio.hernandez@unican.es](mailto:ignacio.hernandez@unican.es)

### Table of contents:

Fig.S1. Lifetime change with annealing temperature and time

Fig.S2. EDX data of 0.2%, 5% and 10% Er<sup>3+</sup>-doped Y<sub>2</sub>O<sub>3</sub>

Fig.S3. Decay curves of Y<sub>1-x</sub>Er<sub>x</sub>O<sub>3/2</sub> (x=0.2%, 0.5%, 1%, 2%, 5% and 10%) under 488 nm OPO excitation

Fig.S4. Decay curves of Y<sub>1-x</sub>Er<sub>x</sub>O<sub>3/2</sub> (x=0.2%, 0.5%, 1%, 2%, 5% and 10%) under 980 nm CW laser excitations

Table S1. Average decay lifetime of Y<sub>1-x</sub>Er<sub>x</sub>O<sub>3/2</sub> (x=0.2%, 0.5%, 1%, 2%, 5% and 10%)

Fig. S5. Lifetimes and spectra of 10% Er<sup>3+</sup>-doped Y<sub>2</sub>O<sub>3</sub> under CW 405nm Laser modulated with different pulse length

Fig. S6. Lifetimes and spectra of 0.2% Er<sup>3+</sup>-doped Y<sub>2</sub>O<sub>3</sub> under CW 405nm Laser modulated with different pulse length

Table S2. Average decay lifetime of 0.2% and 10% Er<sup>3+</sup>-doped Y<sub>2</sub>O<sub>3</sub> for different laser pulse duration

Figure S7. The lifetime of <sup>4</sup>F<sub>9/2</sub> state under different laser pulse length

Figure S8. The lifetime of <sup>4</sup>F<sub>9/2</sub> state under different laser power

Table S3. Average decay lifetime of 10% Er<sup>3+</sup>-doped Y<sub>2</sub>O<sub>3</sub> red emission for different laser pulse lengths and powers

Figure S9. Significant energy transfer processes of the coupled Er<sup>3+</sup> systems.

Table S4. Dynamic equations for the time evolution of the population of the coupled Er<sup>3+</sup> excited states.

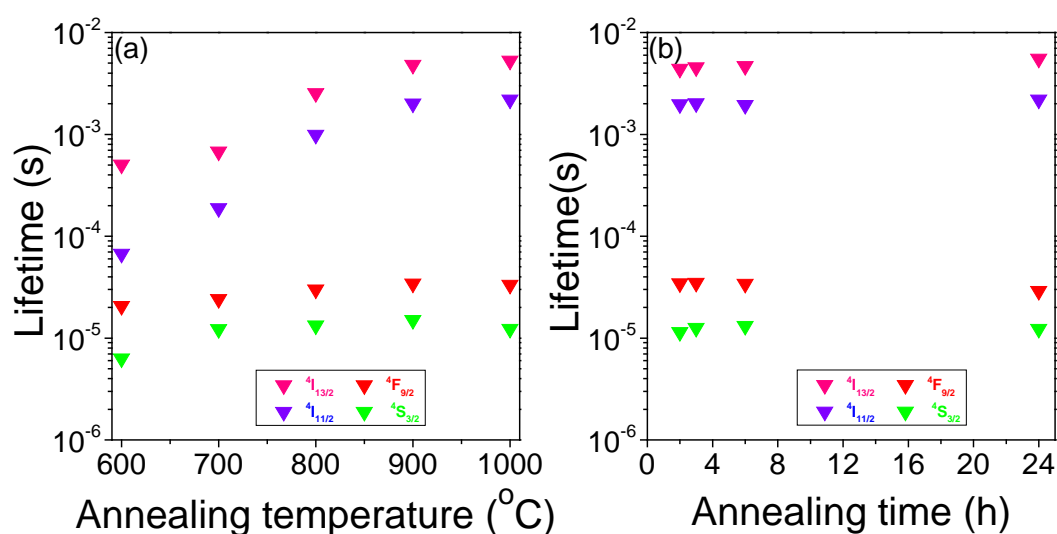

Fig. S1 (a): measured lifetimes of  $^4\text{I}_{13/2}$ ,  $^4\text{I}_{11/2}$ ,  $^4\text{F}_{9/2}$  and  $^4\text{S}_{3/2}$  states of 5%  $\text{Er}^{3+}$ -doped  $\text{Y}_2\text{O}_3$  annealed for 24 hours at different temperature with 488 nm OPO laser; (b): measured lifetimes of  $^4\text{I}_{13/2}$ ,  $^4\text{I}_{11/2}$ ,  $^4\text{F}_{9/2}$  and  $^4\text{S}_{3/2}$  states of 5%  $\text{Er}^{3+}$ -doped  $\text{Y}_2\text{O}_3$  annealed at 1000  $^{\circ}\text{C}$  for different hours with 488 nm OPO laser (power density is  $3 \times 10^6 \text{W}/\text{cm}^2$ ).

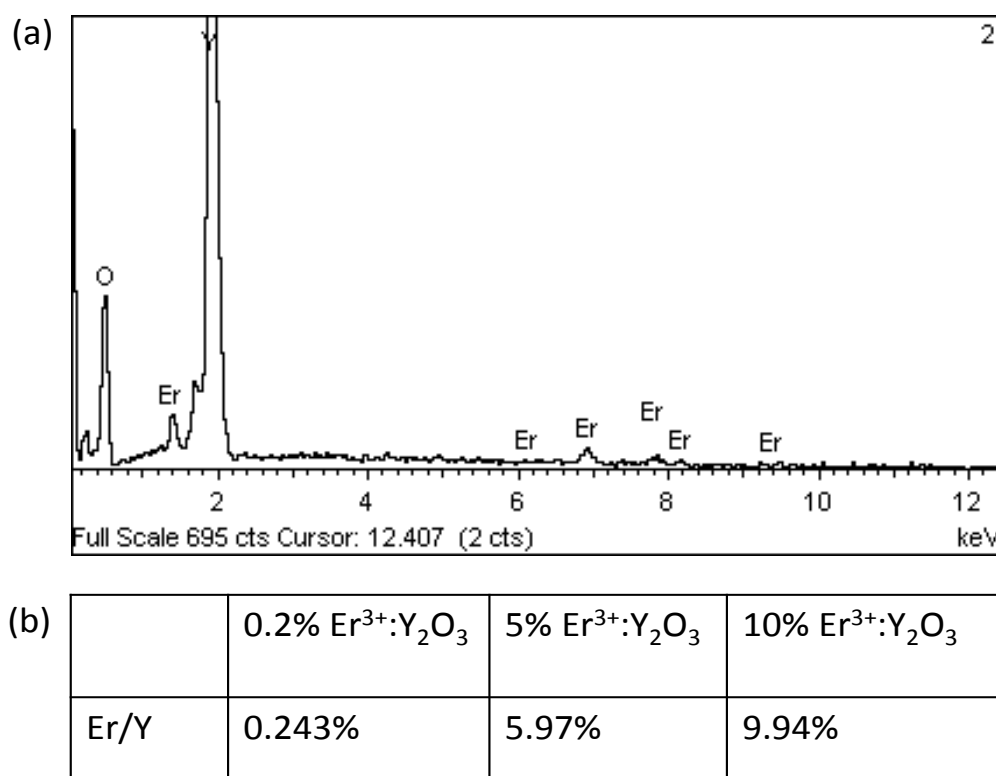

Fig. S2. (a) Energy dispersive X-ray spectroscopy of the 5%  $\text{Er}^{3+}$ -doped  $\text{Y}_2\text{O}_3$ ; (b) the measured elemental ratio of Er/Y of the 0.2%, 5% and 10%  $\text{Er}^{3+}$ -doped  $\text{Y}_2\text{O}_3$  samples.

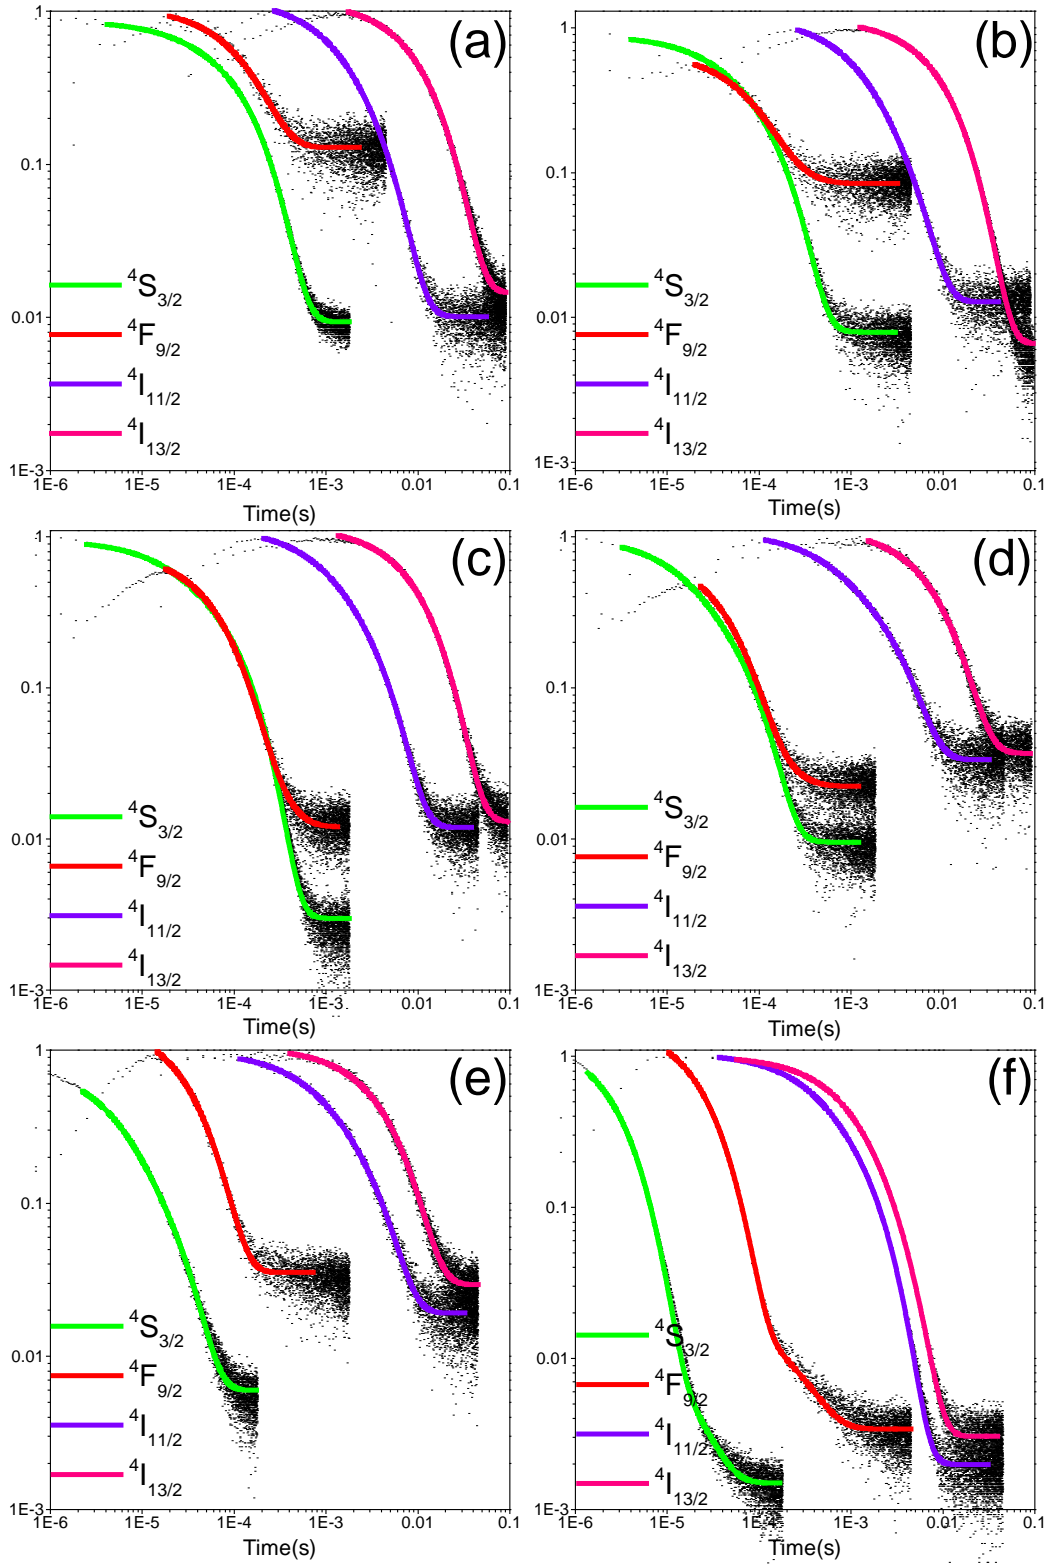

Fig. S3: Intensity decay curves of all emitting states of different concentration doped  $\text{Er}^{3+}$ -doped  $\text{Y}_2\text{O}_3$  under 488 nm OPO laser: (a) 0.2%, (b) 0.5%, (c) 1%, (d) 2%, (e) 5%, (f) 10% (power density is  $3 \times 10^6 \text{ W/cm}^2$ ).

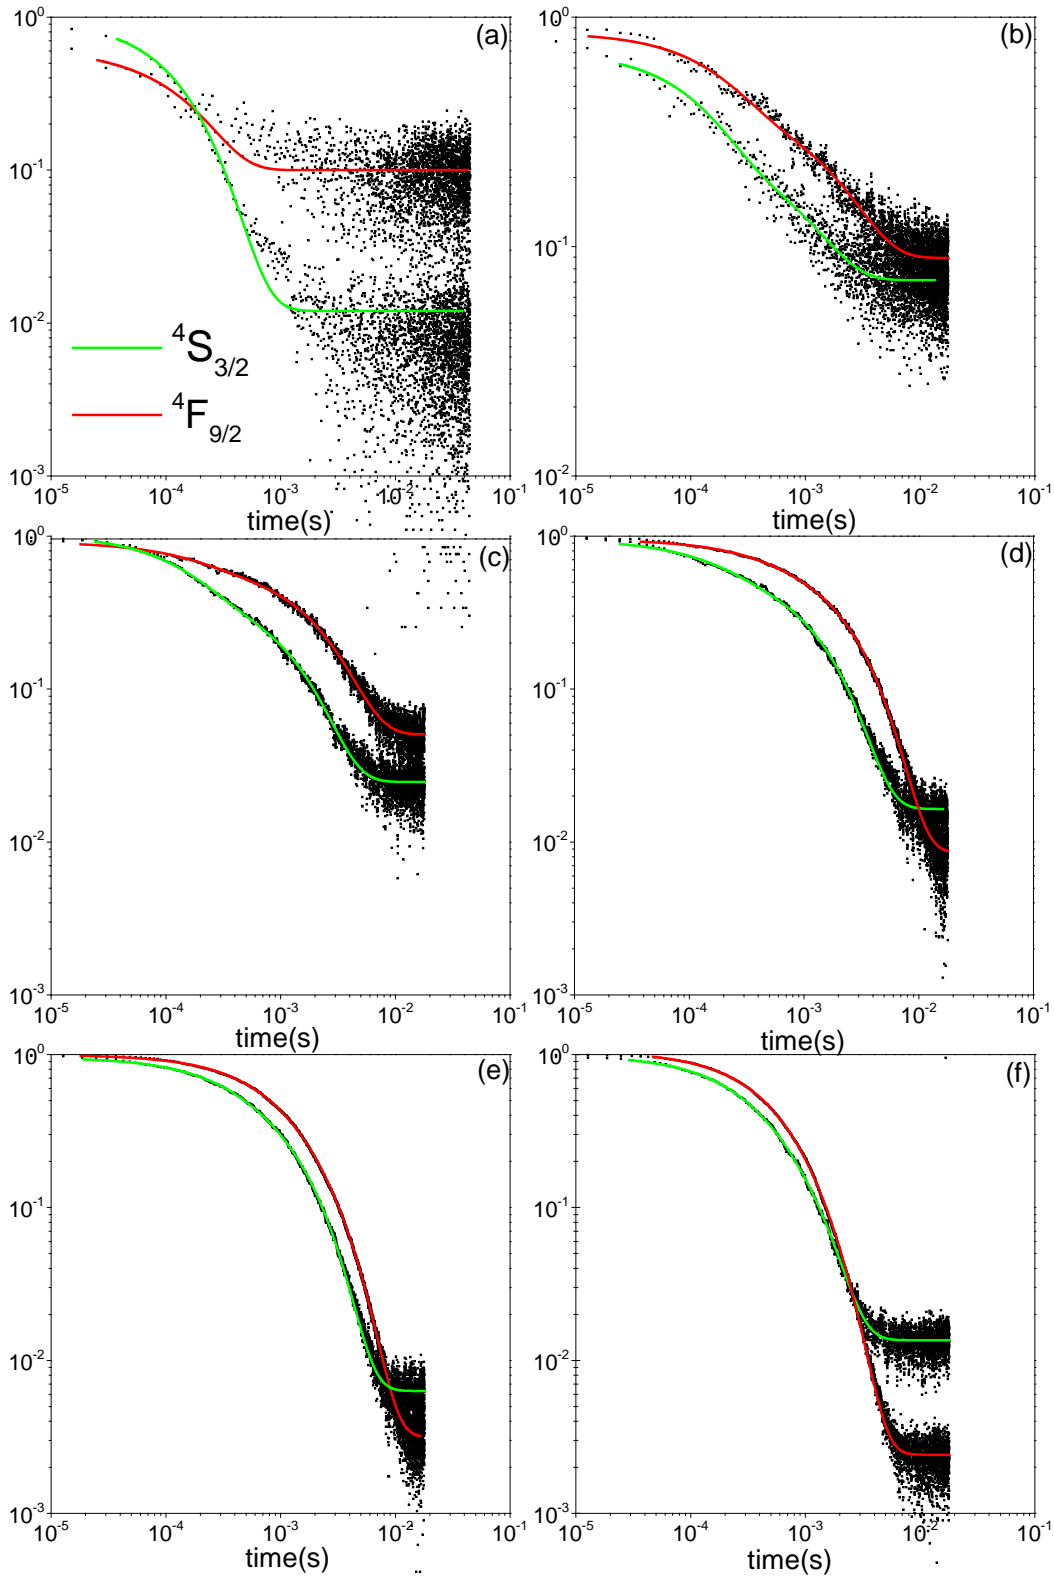

Fig. S4: Intensity decay curves of all emitting states of different concentration doped  $Er^{3+}$ -doped  $Y_2O_3$  under 980 nm CW laser: (a) 0.2%, (b) 0.5%, (c) 1%, (d) 2%, (e) 5%, (f) 10% (power density is  $50 \text{ W/cm}^2$ ).

| Emission Wavelength (nm) | 0.2% Er <sup>3+</sup> -doping |                         | 0.5% Er <sup>3+</sup> -doping |                         | 1% Er <sup>3+</sup> -doping |           |
|--------------------------|-------------------------------|-------------------------|-------------------------------|-------------------------|-----------------------------|-----------|
|                          | 488 nm OPO                    | 980 nm UC               | 488 nm OPO                    | 980 nm UC               | 488 nm OPO                  | 980 nm UC |
| 1535                     | 0.0101                        |                         | 0.00932                       |                         | 0.00952                     |           |
| 980                      | 0.00209                       |                         | 0.00195                       |                         | 0.00212                     |           |
| 660                      | 1.18 x 10 <sup>-4</sup>       | 1.48 x 10 <sup>-4</sup> | 1.03 x 10 <sup>-4</sup>       | 0.00159                 | 7.94 x 10 <sup>-5</sup>     | 0.00191   |
| 560                      | 1.18 x 10 <sup>-4</sup>       | 1.40 x 10 <sup>-4</sup> | 9.84 x 10 <sup>-5</sup>       | 7.45 x 10 <sup>-4</sup> | 7.90 x 10 <sup>-5</sup>     | 0.00101   |

  

| Emission Wavelength (nm) | 2% Er <sup>3+</sup> -doping |           | 5% Er <sup>3+</sup> -doping |           | 10% Er <sup>3+</sup> -doping |                         |
|--------------------------|-----------------------------|-----------|-----------------------------|-----------|------------------------------|-------------------------|
|                          | 488 nm OPO                  | 980 nm UC | 488 nm OPO                  | 980 nm UC | 488 nm OPO                   | 980 nm UC               |
| 1535                     | 0.00742                     |           | 0.0044                      |           | 0.00142                      |                         |
| 980                      | 0.00201                     |           | 0.0019                      |           | 9.79 x 10 <sup>-4</sup>      |                         |
| 660                      | 5.16 x 10 <sup>-5</sup>     | 0.00212   | 3.45 x 10 <sup>-5</sup>     | 0.00152   | 6.51 x 10 <sup>-5</sup>      | 6.92 x 10 <sup>-4</sup> |
| 560                      | 4.46 x 10 <sup>-5</sup>     | 0.00117   | 1.14 x 10 <sup>-5</sup>     | 0.0011    | 3.07 x 10 <sup>-6</sup>      | 6.02 x 10 <sup>-4</sup> |

Table S1. Average decay times of the emitting states of the studied Er<sup>3+</sup>-doped Y<sub>2</sub>O<sub>3</sub> samples under 488 nm OPO (power density is 3×10<sup>6</sup> W/cm<sup>2</sup>) and 980 nm (power density is 50W/cm<sup>2</sup>) UC excitation conditions. Numbers (in seconds) correspond to solid symbols in figure 3.

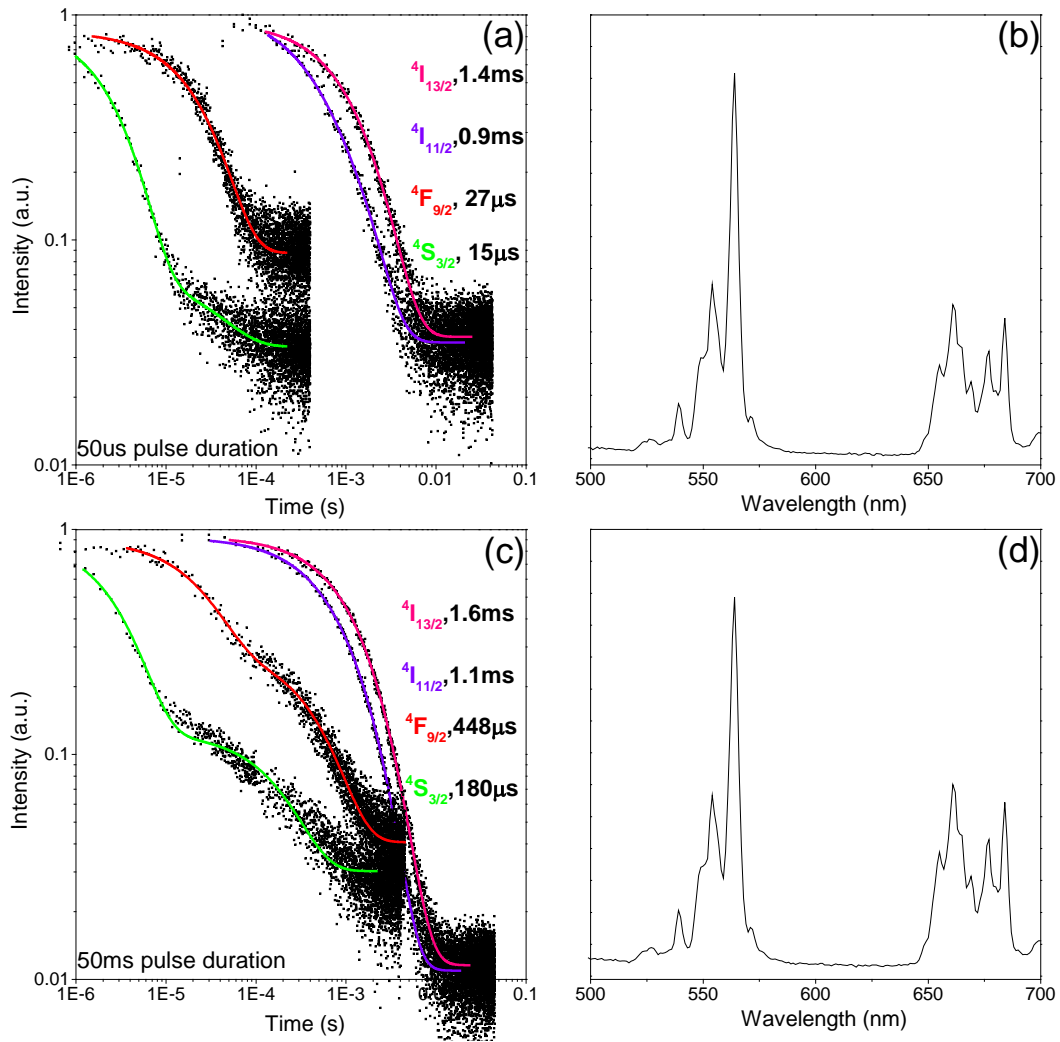

Fig. S5. (a) Intensity decay curves of <sup>4</sup>I<sub>13/2</sub>, <sup>4</sup>I<sub>11/2</sub>, <sup>4</sup>F<sub>9/2</sub> and <sup>4</sup>S<sub>3/2</sub> states of 10% Er<sup>3+</sup>-doped Y<sub>2</sub>O<sub>3</sub> with 405 CW laser modulated at 50 μs pulse length; (b) emission spectrum of 10% Er<sup>3+</sup>-doped Y<sub>2</sub>O<sub>3</sub> with 405 CW laser modulated at 50 μs pulse length; (c) intensity decay curves of <sup>4</sup>I<sub>13/2</sub>, <sup>4</sup>I<sub>11/2</sub>, <sup>4</sup>F<sub>9/2</sub> and <sup>4</sup>S<sub>3/2</sub> states of 10% Er<sup>3+</sup>-doped Y<sub>2</sub>O<sub>3</sub> with 405 CW laser modulated at 50 ms pulse length; (d) emission spectrum of 10% Er<sup>3+</sup>-doped Y<sub>2</sub>O<sub>3</sub> with 405 CW laser modulated at 50 ms pulse length; It is worth noting here the long lifetime of <sup>4</sup>F<sub>9/2</sub> and <sup>4</sup>S<sub>3/2</sub> state in Fig. S5(C) is due to the CR process (power density is 16 W/cm<sup>2</sup>).

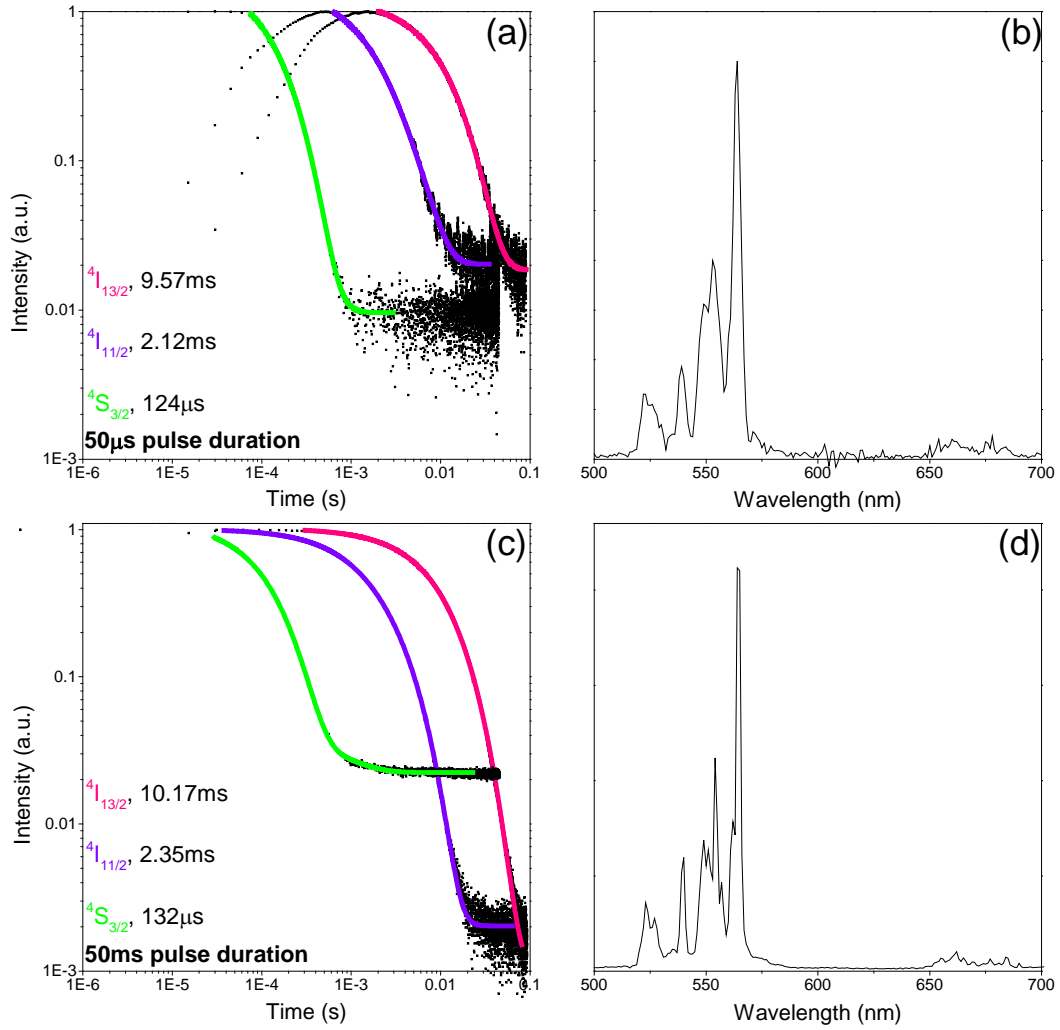

Fig. S6. (a) Intensity decay curves of  $^4I_{13/2}$ ,  $^4I_{11/2}$ ,  $^4F_{9/2}$  and  $^4S_{3/2}$  states of 0.2%  $Er^{3+}$ -doped  $Y_2O_3$  with 405 CW laser modulated at 50  $\mu s$  pulse length; (b) emission spectrum of 0.2%  $Er^{3+}$ -doped  $Y_2O_3$  with 405 CW laser modulated at 50  $\mu s$  pulse length; (c) intensity decay curves of  $^4I_{13/2}$ ,  $^4I_{11/2}$ ,  $^4F_{9/2}$  and  $^4S_{3/2}$  states of 0.2%  $Er^{3+}$ -doped  $Y_2O_3$  with 405 CW laser modulated at 50 ms pulse length; (d) emission spectrum of 0.2%  $Er^{3+}$ -doped  $Y_2O_3$  with 405 CW laser modulated at 50 ms pulse length (power density is 16  $W/cm^2$ ).

| Emission<br>Wavelength (nm) | 0.2% $Er^{3+}$ -doping |                       | 10% $Er^{3+}$ -doping |                       |
|-----------------------------|------------------------|-----------------------|-----------------------|-----------------------|
|                             | 50 $\mu s$             | 50 ms                 | 50 $\mu s$            | 50 ms                 |
| 1535                        | 0.00957                | 0.01017               | 0.00144               | 0.00157               |
| 980                         | 0.00212                | 0.00235               | $9.07 \times 10^{-4}$ | 0.00114               |
| 660                         |                        |                       | $2.62 \times 10^{-5}$ | $4.48 \times 10^{-4}$ |
| 560                         | $1.24 \times 10^{-4}$  | $1.32 \times 10^{-4}$ | $1.49 \times 10^{-5}$ | $1.80 \times 10^{-4}$ |

Table S2. Average decay times of the emitting states of the 0.2% and 10%  $Er^{3+}$ -doped  $Y_2O_3$  samples under 405 nm excitation for the corresponding laser pulse durations. Numbers (in seconds) correspond to empty symbols in figure 3 (power density is 16  $W/cm^2$ ).

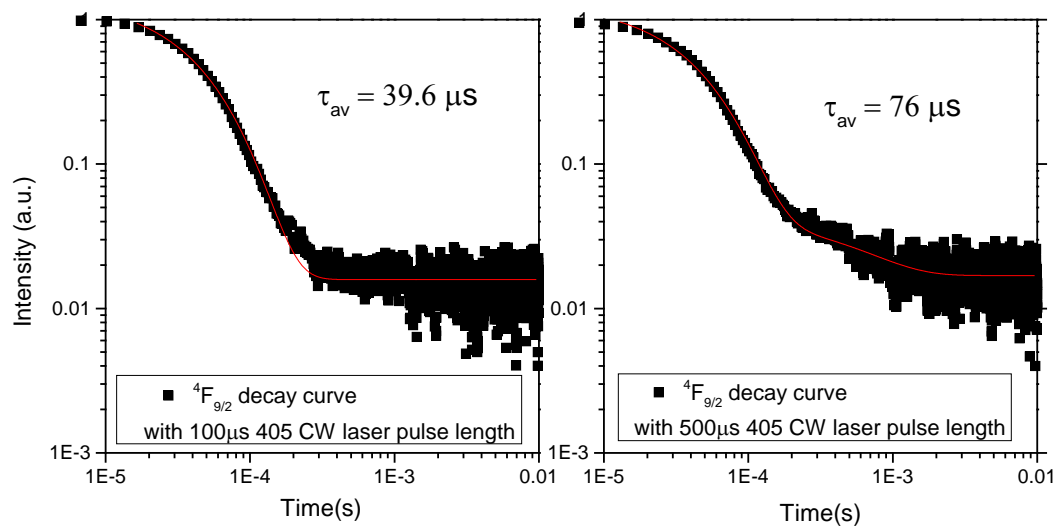

Figure S7. The lifetime of  $^4F_{9/2}$  state under different laser pulse length (power density is 16 W/cm<sup>2</sup>).



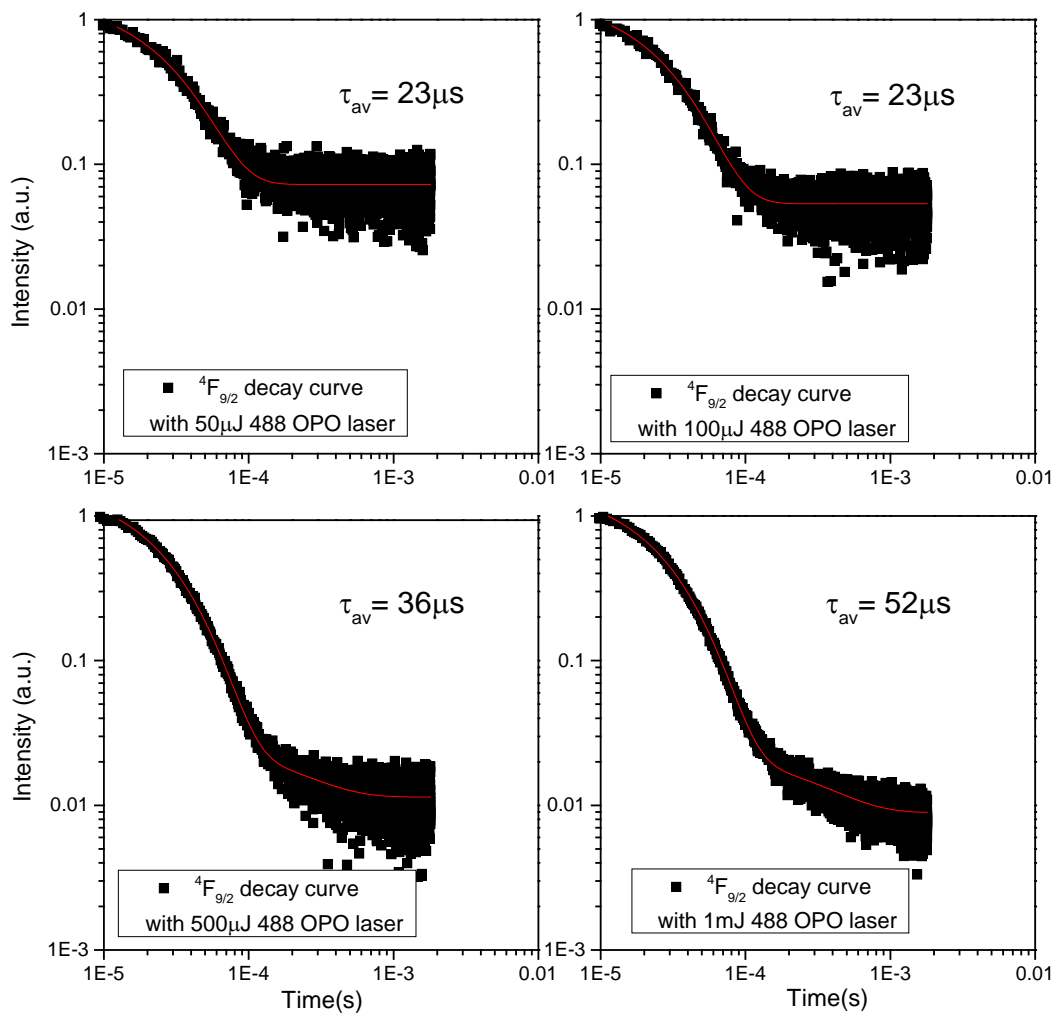

Figure S8. The lifetime of  ${}^4F_{9/2}$  state under different laser power.

| 488 nm OPO laser<br>excitation power<br>(approx. power density) | Average decay time at<br>660 nm of 10% $\text{Er}^{3+}$ -doped<br>$\text{Y}_2\text{O}_3$ |
|-----------------------------------------------------------------|------------------------------------------------------------------------------------------|
| 50 $\mu\text{J}$ ( $1.5 \times 10^5 \text{W/cm}^2$ )            | $2.32 \times 10^{-5}$                                                                    |
| 100 $\mu\text{J}$ ( $3 \times 10^5 \text{W/cm}^2$ )             | $2.30 \times 10^{-5}$                                                                    |
| 500 $\mu\text{J}$ ( $1.5 \times 10^6 \text{W/cm}^2$ )           | $3.56 \times 10^{-5}$                                                                    |
| 1 mJ ( $3 \times 10^6 \text{W/cm}^2$ )                          | $5.16 \times 10^{-5}$                                                                    |
| 1.2 mJ ( $3.6 \times 10^6 \text{W/cm}^2$ )                      | $6.50 \times 10^{-5}$                                                                    |

Table S3. Average decay time (in second) of the 10% Er-doped  $\text{Y}_2\text{O}_3$  red emission under variable excitation powers (OPO excitation at 488 nm).

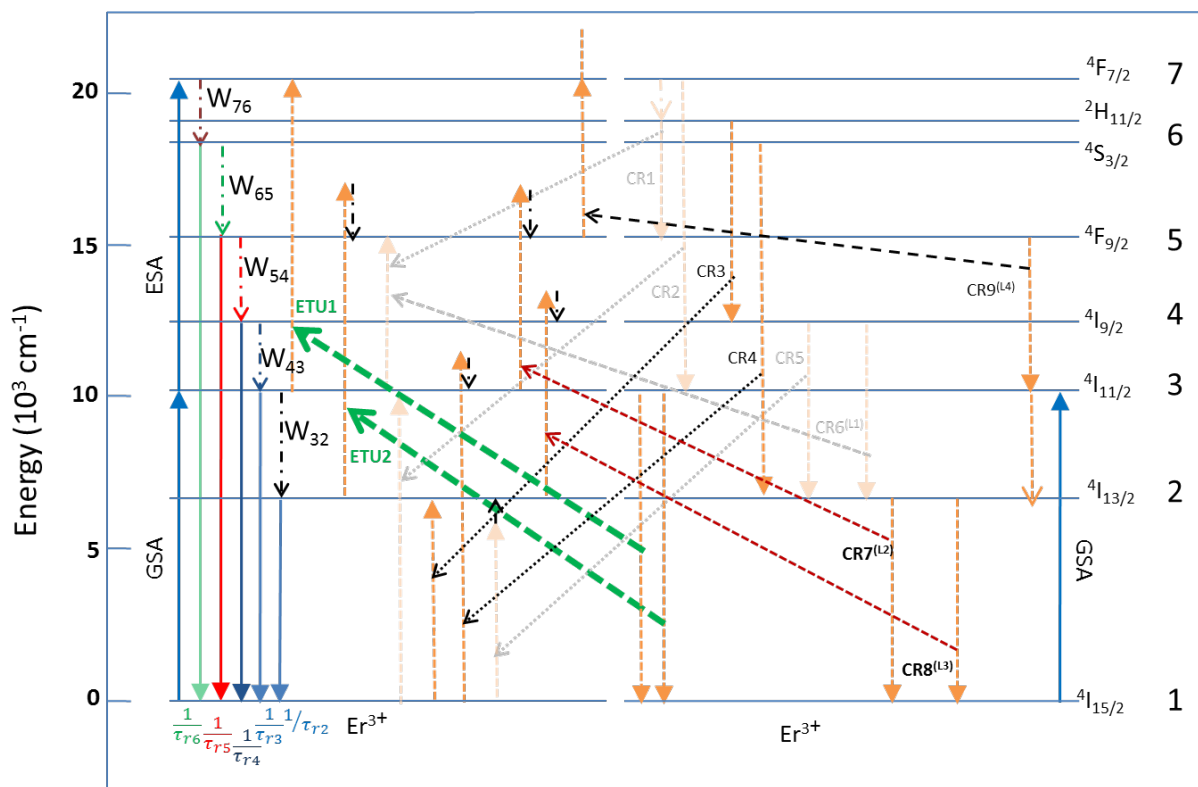

Figure S9. Significant energy transfer processes of the coupled  $\text{Er}^{3+}$  systems. See below and the main text for a description and interpretation of the  $\tau_{ri}$  and  $W_{ij}$  parameters. Note that only the lower lying-states of the  $\text{Er}^{3+}$  configurations are considered, as our experiments can be considered low pumping power conditions (no significant spectral or dynamic changes are observed upon varying the UC powers, nor involving a higher population of the higher-lying states (with excitation at 378 nm)).

|                                                                                                                                                                                                                         |
|-------------------------------------------------------------------------------------------------------------------------------------------------------------------------------------------------------------------------|
| $\dot{n}_6 = -\frac{n_6}{\tau_{r6}} - W_{65}n_6 + W_{76}n_7 + W_{ETU1}n_3^2 + W'_{CR9}n_5^2 - W_{CR3}n_6n_1 - W_{CR4}n_6n_1 \quad (S1)$                                                                                 |
| $\dot{n}_5 = -\frac{n_5}{\tau_{r5}} - W_{54}n_5 + W_{65}n_6 + W_{ETU2}n_3n_2 + W_{CR7}n_3n_2 - 2W_{CR9}n_5^2 \quad (S4)$                                                                                                |
| $\dot{n}_4 = -\frac{n_4}{\tau_{r4}} - W_{43}n_4 + W_{54}n_5 + -W_{CR3}n_6n_1 + W_{CR8}n_2^2 \quad (S3)$                                                                                                                 |
| $\dot{n}_3 = -\frac{n_3}{\tau_{r3}} - W_{32}n_4 + W_{43}n_4 + W_{CR4}n_6n_1 + W''_{CR9}n_5^2 - 2W_{ETU1}n_3^2 - W_{ETU2}n_3n_2 - W_{CR7}n_3n_2 \quad (S4)$                                                              |
| $\dot{n}_2 = -\frac{n_2}{\tau_{r2}} + W_{32}n_3 + W_{CR9}n_5^2 + W_{CR3}n_6n_1 - W_{ETU2}n_3n_2 - 2W_{CR8}n_2^2 - W_{CR7}n_3n_2 \quad (S5)$                                                                             |
| $\dot{n}_1 = \frac{n_2}{\tau_{r2}} + \frac{n_3}{\tau_{r3}} + \frac{n_4}{\tau_{r4}} + \frac{n_5}{\tau_{r5}} - W_{ETU1}n_3^2 - W_{ETU2}n_3n_2 - W_{CR3}n_6n_1 - W_{CR4}n_6n_1 - W_{CR7}n_3n_2 - 2W_{CR8}n_2^2 \quad (S6)$ |

Table S4. Dynamic differential equations corresponding to the population of the coupled Er<sup>3+</sup> states with the active energy transfers and decays as labelled in figure S9 after illumination.

The radiative decay probability (per unit time) of a corresponding state  $i$  is given as  $1/\tau_i$ .

$W_{ij}$  represents the radiative and non-radiative probability per unit time of a state decaying to the immediately lower-lying one.  $1/\tau_i = 1/\tau_{ri} + \sum_j W_{ij}$ .  $\tau_{ri}$  and  $\tau_i$  (or equivalently,  $W_{ij}$ ) depend only on the host matrix and temperature, being irrespective of the Er<sup>3+</sup> concentration (and thus are dominant for very diluted systems and can be derived from absorption and time-resolved spectroscopy). The approximations  $W_{ij}$  is negligible ( $\ll$ ) for  $i > j+1$ ,  $W_{ij} = W_{76}$  for  $i > 6$ ,  $W_{21} \ll$  have been included above, (even in the cases of significant branching ratio parameters for a given couple of levels, etc.)

The probability per unit time of a CR process CR $k$  is given by the corresponding rate  $W_{CRk}$  and, similarly, for ETU processes,  $W_{ETUk}$  is the corresponding rate.

Other departing approximations include  $W_{CRk} \ll$  for cross-relaxations labelled CR $k$ , if involve the energy transfer from a level  $i$  and  $1/\tau_i$  is considerably high. They will not affect significantly the dynamics, in comparison to other processes. This involves the faded processes depicted in figure S9.

Further approximations can be made considering the reduced value of  $W_{CR9}$ , quantifying the concentration quenching CR processes depopulating the red emitting state, which is often neglected in the literature and as it can be observed that, for the given excitation conditions, it is not very significant for the 0.5 to approx. 2% Er<sup>3+</sup> concentration range in the Er<sup>3+</sup>-doped Y<sub>2</sub>O<sub>3</sub> system, so for

these concentrations, the grey terms can be neglected, but not necessarily all of them for higher concentrations.

Importantly, ETU2 and CR7<sup>(L2)</sup> processes are indistinguishable, as both involve equivalent Er<sup>3+</sup> pairs so a further simplification can be made  $W_{\text{ETU2}} + W_{\text{CR7}} = W_{\text{II}}$ , irrespective of the erbium concentration.

As discussed in the main text, from the observed spectroscopic behaviour, we can determine that  $W_{\text{CRI}}$ ,  $W_{\text{ETUj}}$  are considerably small for 0.2% Er<sup>3+</sup>-doped Y<sub>2</sub>O<sub>3</sub>, although at least  $W_{\text{ETU1}}$  and  $W_{\text{II}}$  ( $W_{\text{II}} = W_{\text{ETU2}} + W_{\text{CR7(L2)}}$ ) become important for Er<sup>3+</sup> concentrations higher than 0.5% in the Er<sup>3+</sup>-doped Y<sub>2</sub>O<sub>3</sub> system for the studied excitation conditions. This implies these mechanism are the driving processes for the UC for Er<sup>3+</sup> concentrations higher than  $6.71 \times 10^{19}$  Er<sup>3+</sup> ions / cm<sup>3</sup>, in this matrix.

Also, over the studied Er<sup>3+</sup> concentrations range and excitation conditions,  $\tau_4$  is considerably small and  $W_{43}n_4$  can be considered dominant. The term in  $W_{65}n_6$  can also be considered small, as in the DC / ESA processes, the red emission is very much negligible in comparison with the green one. This approximation is considered in the main text when discussion the photoluminescence properties for Er<sup>3+</sup> concentrations 0.5% and higher. It implies that  $W_{\text{ETU2}} + W_{\text{CR7}} = W_{\text{II}}$  is the dominant term for populating the <sup>4</sup>F<sub>9/2</sub> state (level 5, red emission) in UC and, together with other looping mechanisms, contribute to the distinct behaviour of the emission of this state (see main text).

The solution of the equations under the consideration that CR3, CR4 are not significant, and that energy transfer from <sup>4</sup>I<sub>11/2</sub> (state 3) is much smaller than the decay constant,  $1/\tau_3 \gg 2W_{\text{ETU1}}n_3^2 + W_{\text{II}}n_3n_2 + \dots$ , leads [see Ref. 21, from the main text] to an asymptotic temporal decay of <sup>4</sup>F<sub>9/2</sub> (level 5, red emission)  $1/\tau_{\text{av5}} = 1/\tau_2 + 1/\tau_3 \approx 1/\tau_3$ , and a corresponding  $\tau_{\text{av6}} = \tau_3/2$  for <sup>4</sup>S<sub>3/2</sub> (level 6, green emission). This is exactly what we observe in the 0.5-2% concentration range (see Figure 3 in the text, table S1 above), also note that the DC lifetimes are similar for the excitation conditions.

Importantly, as described in the text, the above approximation is no longer valid for Er<sup>3+</sup> concentrations higher than 5%, in the excitation conditions so CR mechanisms become severe, and the average decay constant decreases. This causes also differences in the DC lifetimes, which (for given excitation conditions) are observed to increase in the case of the <sup>4</sup>F<sub>9/2</sub> (level 5, red emission). This is assigned, as described in the text, to the influence of looping mechanisms feeding the red-emitting state from longer-lived lower-lying reservoirs. These mechanism also affect the DC lifetime in other excitation conditions (see main text and above, e.g. tables S2 and S3).

The above analysis of the CR and ET mechanisms that describe the dynamic and spectral behaviour in the DC and UC processes have important consequences not only in the general case concentrated Er<sup>3+</sup> systems but, importantly, in the case of Er<sup>3+</sup>/Yb<sup>3+</sup> co-doped systems, not only because in most of practical systems the Er concentration is typically higher than  $6.71 \times 10^{19}$  Er<sup>3+</sup> ions / cm<sup>3</sup> (for NaYF<sub>4</sub>: 2% Er, 20% Yb, for instance, it is more than 10<sup>4</sup> times that, in the order of 10<sup>24</sup> Er<sup>3+</sup> ions / cm<sup>3</sup>), but also because the analogous ET mechanisms from the much more absorbing Yb<sup>3+</sup> ions, whose excited energy is similar to our excitation energies, will be considerable.
